# Supplementary material
Source: publisher figshare collection journal article supplement (https://tandf.figshare.com/ndownloader/files/21481770)

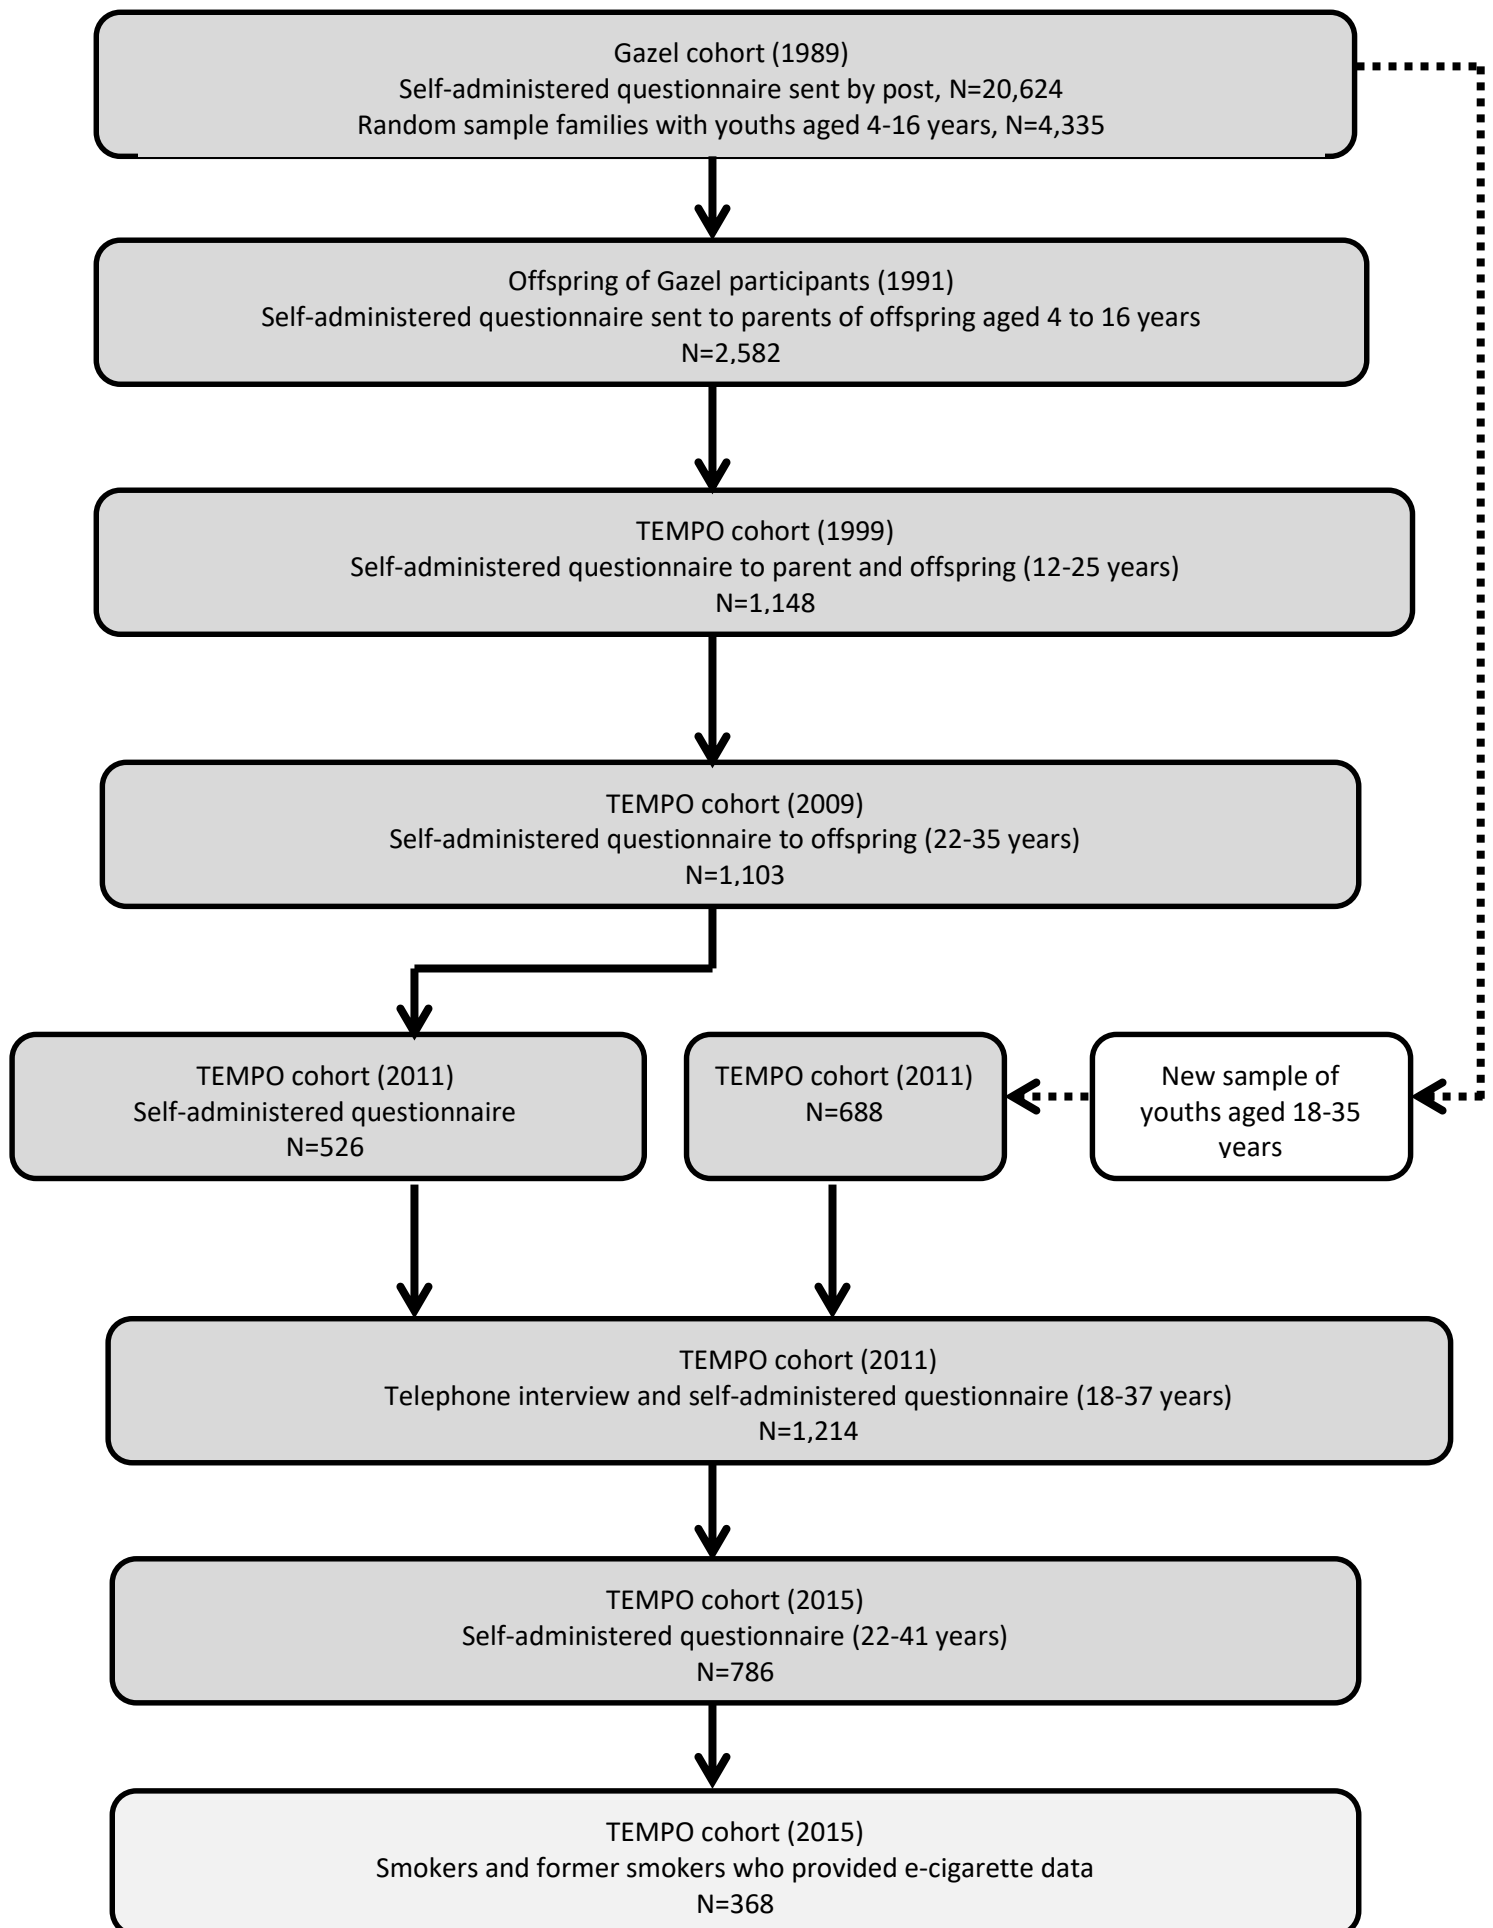

Supplement: Supplementary file 1 [file 21481770]
